# Supplementary material
Source: publisher figshare collection journal article supplement (https://acs.figshare.com/ndownloader/files/3968485)
Supplement: Supplementary file 1 [file 3968485]

  
#==========================================================================
data_global
#==========================================================================

_audit_creation_method           SHELXL-97
_audit_creation_date             '9 November 2005'

#========================================================================== 


# SUBMISSION DETAILS

_publ_contact_author_name        'Richard E. P. Winpenny'
_publ_contact_author_address     
; School of Chemistry,  
  University of Manchester, 
  Oxford road M13 9PL, 
  England
;
_publ_contact_author_email       richard.winpenny@manchester.ac.uk
_publ_contact_author_phone       +44-161-275-4654
_publ_contact_author_fax         
loop_
_publ_author_name
_publ_author_address

'Langley, Stuart K.'
; School of Chemistry, 
  Monash University, 
  PO Box 23, 
  VIC 3800, 
  Australia
;
'Helliwell, Madeleine'
; School of Chemistry, 
  University of Manchester, 
  Oxford road, 
  M13 9PL, 
  England
;
'Teat, Simon'  
; Lawrence Berkeley National lab, 
  1 Cyclotron road, 
  Berkeley, CA, 
  94720, 
  USA
;
'Winpenny, Richard E. P.'  
; School of Chemistry, 
  University of Manchester, 
  Oxford road, 
  M13 9PL, 
  England

;

_publ_contact_letter             
;
;

_publ_requested_journal          'Dalton Transactions'
_publ_requested_category         ?
_publ_section_title              
;
Synthesis and characterisation of nickel(II) phosphonate complexes
utilizing pyridonates and carboxylates as co-ligands.
;

_publ_section_abstract           
;
;

_publ_section_comment            
; 
;

_publ_section_exptl_prep         
;
;

_publ_section_exptl_refinement
;
The structure was solved by direct methods.
The asymmetric unit contains one half of the cage.
Three of the carbon atoms of a pivalate ligand are disordered over two
positions with 78:28 occupancies. Thermal (ISOR) restraints were placed on
three of these atoms. 
All non-H atoms were refined anisotropically.
H atoms were included in calculated positions.
;

_publ_section_references
;Bruker (1997) SMART (Version 5.054) and SAINT-Plus 
(Version 6.45). Bruker AXS Inc., Madison, Wisconsin, USA.

Bruker (2001) XCIF (Version 6.12). Bruker AXS Inc., Madison, Wisconsin, USA.

Bruno, I. J., Cole, J. C., Edgington, P. R., Kessler, M., Macrae, C. F., 
McCabe, P., Pearson, J. and Taylor, R. (2002) Acta Cryst., B58, 389--397. 

Farrugia, L. J. (1997) J. Appl. Cryst., 30, 565--565.

Sheldrick, G. M. (1990) Acta Cryst., A46, 467--473.

Sheldrick, G. M. (1997) SHELXL97., University of Gottingen, Germany.

Sheldrick, G. M. (1996) SADABS., University of Gottingen, Germany. 
;

_publ_section_figure_captions
;    
;

_publ_section_table_legends
;
;
_chemical_name_systematic
;
 ?
;  
_chemical_name_common             ? 
_chemical_melting_point           ? 
_chemical_formula_moiety          ? 
_chemical_formula_sum 
 'C92 H116 Cl6 F2 N10 Ni10 O28 P2' 
_chemical_formula_weight          2709.69 
 
loop_ 
 _atom_type_symbol 
 _atom_type_description 
 _atom_type_scat_dispersion_real 
 _atom_type_scat_dispersion_imag 
 _atom_type_scat_source 
 'C'  'C'   0.0033   0.0016 
 'International Tables Vol C Tables 4.2.6.8 and 6.1.1.4' 
 'H'  'H'   0.0000   0.0000 
 'International Tables Vol C Tables 4.2.6.8 and 6.1.1.4' 
 'N'  'N'   0.0061   0.0033 
 'International Tables Vol C Tables 4.2.6.8 and 6.1.1.4' 
 'O'  'O'   0.0106   0.0060 
 'International Tables Vol C Tables 4.2.6.8 and 6.1.1.4' 
 'F'  'F'   0.0171   0.0103 
 'International Tables Vol C Tables 4.2.6.8 and 6.1.1.4' 
 'P'  'P'   0.1023   0.0942 
 'International Tables Vol C Tables 4.2.6.8 and 6.1.1.4' 
 'Cl'  'Cl'   0.1484   0.1585 
 'International Tables Vol C Tables 4.2.6.8 and 6.1.1.4' 
 'Ni'  'Ni'   0.3393   1.1124 
 'International Tables Vol C Tables 4.2.6.8 and 6.1.1.4' 
 
_symmetry_cell_setting            monoclinic 
_symmetry_space_group_name_H-M    P21/n
 
loop_ 
 _symmetry_equiv_pos_as_xyz 
 'x, y, z' 
 '-x+1/2, y+1/2, -z+1/2' 
 '-x, -y, -z' 
 'x-1/2, -y-1/2, z-1/2' 
 
_cell_length_a                    14.9120(7) 
_cell_length_b                    23.1537(12) 
_cell_length_c                    16.1217(8) 
_cell_angle_alpha                 90.00 
_cell_angle_beta                  90.734(2) 
_cell_angle_gamma                 90.00 
_cell_volume                      5565.8(5) 
_cell_formula_units_Z             2 
_cell_measurement_temperature     150(2) 
_cell_measurement_reflns_used     7806 
_cell_measurement_theta_min       1.99 
_cell_measurement_theta_max       29.87 
 
_exptl_crystal_description        plate 
_exptl_crystal_colour             green 
_exptl_crystal_size_max           0.10 
_exptl_crystal_size_mid           0.08 
_exptl_crystal_size_min           0.01 
_exptl_crystal_density_meas       ? 
_exptl_crystal_density_diffrn     1.617 
_exptl_crystal_density_method     'not measured' 
_exptl_crystal_F_000              2784 
_exptl_absorpt_coefficient_mu     1.902 
_exptl_absorpt_correction_type    ? 
_exptl_absorpt_correction_T_min   0.8326 
_exptl_absorpt_correction_T_max   0.9757 
_exptl_absorpt_process_details    ? 
 
_exptl_special_details 
; 
 ? 
; 
 
_diffrn_ambient_temperature       150(2) 
_diffrn_radiation_wavelength      0.68940 
_diffrn_radiation_type            synchrotron 
_diffrn_radiation_source          'fine-focus sealed tube' 
_diffrn_radiation_monochromator   graphite 
_diffrn_measurement_device_type   'CCD area detector'  
_diffrn_measurement_method        'phi and omega scans'  
_diffrn_detector_area_resol_mean  ? 
_diffrn_standards_number          ? 
_diffrn_standards_interval_count  ? 
_diffrn_standards_interval_time   ? 
_diffrn_standards_decay_%         ? 
_diffrn_reflns_number             64081 
_diffrn_reflns_av_R_equivalents   0.0438 
_diffrn_reflns_av_sigmaI/netI     0.0411 
_diffrn_reflns_limit_h_min        -21 
_diffrn_reflns_limit_h_max        21 
_diffrn_reflns_limit_k_min        -32 
_diffrn_reflns_limit_k_max        32 
_diffrn_reflns_limit_l_min        -22 
_diffrn_reflns_limit_l_max        23 
_diffrn_reflns_theta_min          1.79 
_diffrn_reflns_theta_max          29.49 
_reflns_number_total              16910 
_reflns_number_gt                 12979 
_reflns_threshold_expression      >2sigma(I) 
 
_computing_data_collection        'Bruker SMART'  
_computing_cell_refinement        'Bruker SMART'  
_computing_data_reduction         'Bruker SMART'  
_computing_structure_solution     'SHELXS-97 (Sheldrick, 1990)' 
_computing_structure_refinement   'SHELXL-97 (Sheldrick, 1997)' 
_computing_molecular_graphics     'Bruker SHELXTL' 
_computing_publication_material   'Bruker SHELXTL' 
 
_refine_special_details 
; 
 Refinement of F^2^ against ALL reflections.  The weighted R-factor wR and 
 goodness of fit S are based on F^2^, conventional R-factors R are based 
 on F, with F set to zero for negative F^2^. The threshold expression of 
 F^2^ > 2sigma(F^2^) is used only for calculating R-factors(gt) etc. and is 
 not relevant to the choice of reflections for refinement.  R-factors based 
 on F^2^ are statistically about twice as large as those based on F, and R- 
 factors based on ALL data will be even larger. 
The structure was solved by direct methods.
The asymmetric unit contains one half of the cage.
Three of the carbon atoms of a pivalate ligand are disordered over two
positions with 78:28 occupancies. Thermal (ISOR) restraints were placed on
three of these atoms. 
All non-H atoms were refined anisotropically.
H atoms were included in calculated positions.
; 
 
_refine_ls_structure_factor_coef  Fsqd  
_refine_ls_matrix_type            full 
_refine_ls_weighting_scheme       calc  
_refine_ls_weighting_details 
 'calc w=1/[\s^2^(Fo^2^)+(0.0563P)^2^+5.1731P] where P=(Fo^2^+2Fc^2^)/3' 
_atom_sites_solution_primary      direct 
_atom_sites_solution_secondary    difmap 
_atom_sites_solution_hydrogens    geom 
_refine_ls_hydrogen_treatment     mixed 
_refine_ls_extinction_method      none 
_refine_ls_extinction_coef        ? 
_refine_ls_number_reflns          16910 
_refine_ls_number_parameters      721 
_refine_ls_number_restraints      18 
_refine_ls_R_factor_all           0.0593 
_refine_ls_R_factor_gt            0.0428 
_refine_ls_wR_factor_ref          0.1229 
_refine_ls_wR_factor_gt           0.1144 
_refine_ls_goodness_of_fit_ref    1.044 
_refine_ls_restrained_S_all       1.044 
_refine_ls_shift/su_max           0.001 
_refine_ls_shift/su_mean          0.000 
 
loop_ 
 _atom_site_label 
 _atom_site_type_symbol 
 _atom_site_fract_x 
 _atom_site_fract_y 
 _atom_site_fract_z 
 _atom_site_U_iso_or_equiv 
 _atom_site_adp_type 
 _atom_site_occupancy 
 _atom_site_symmetry_multiplicity 
 _atom_site_calc_flag 
 _atom_site_refinement_flags 
 _atom_site_disorder_assembly 
 _atom_site_disorder_group 
Ni1 Ni 0.10055(2) 0.029541(16) 0.23674(2) 0.02629(8) Uani 1 1 d . . . 
Ni2 Ni -0.08185(2) 0.040967(14) 0.38585(2) 0.02395(8) Uani 1 1 d . . . 
Ni3 Ni 0.10907(2) 0.076956(14) 0.53489(2) 0.02325(8) Uani 1 1 d . . . 
Ni4 Ni 0.25625(2) 0.050058(15) 0.35321(2) 0.02521(8) Uani 1 1 d . . . 
Ni5 Ni 0.04509(2) 0.142014(15) 0.34954(2) 0.02490(8) Uani 1 1 d . . . 
Cl1 Cl 0.09210(8) 0.07338(7) 0.00218(6) 0.0789(4) Uani 1 1 d . . . 
Cl2 Cl 0.47346(6) 0.13847(4) 0.29856(6) 0.0478(2) Uani 1 1 d . . . 
Cl3 Cl 0.01656(7) 0.28027(4) 0.21853(6) 0.0536(2) Uani 1 1 d . . . 
P1 P 0.09688(5) -0.03539(3) 0.41520(4) 0.02302(13) Uani 1 1 d . . . 
F1 F 0.02146(10) 0.08462(6) 0.43842(9) 0.0250(3) Uani 1 1 d . . . 
O1 O 0.16463(13) 0.10187(8) 0.29072(12) 0.0271(4) Uani 1 1 d . . . 
O2 O -0.00384(13) -0.03680(8) 0.39492(11) 0.0246(4) Uani 1 1 d . . . 
O3 O 0.08662(14) 0.16278(8) 0.55655(12) 0.0293(4) Uani 1 1 d . . . 
O4 O 0.12166(12) -0.01010(8) 0.50051(11) 0.0237(4) Uani 1 1 d . . . 
O5 O 0.14664(13) -0.00286(8) 0.34631(11) 0.0245(4) Uani 1 1 d . . . 
O6 O -0.01614(13) 0.07278(8) 0.28144(11) 0.0271(4) Uani 1 1 d . . . 
O7 O 0.21697(13) 0.09117(8) 0.46089(12) 0.0272(4) Uani 1 1 d . . . 
O8 O -0.17690(15) 0.00803(9) 0.31289(13) 0.0357(5) Uani 1 1 d . . . 
O9 O 0.31789(15) 0.02494(10) 0.25077(13) 0.0349(5) Uani 1 1 d . . . 
O10 O -0.06929(14) 0.18442(9) 0.35893(14) 0.0341(4) Uani 1 1 d . . . 
O11 O 0.10524(14) 0.19647(9) 0.42727(12) 0.0312(4) Uani 1 1 d . . . 
O12 O -0.19902(15) -0.07797(9) 0.37015(13) 0.0334(4) Uani 1 1 d . . . 
O13 O -0.16293(14) 0.11204(9) 0.38999(13) 0.0318(4) Uani 1 1 d . . . 
O14 O 0.20129(15) 0.00631(10) 0.16607(13) 0.0350(5) Uani 1 1 d . . . 
N1 N 0.02166(18) 0.07556(12) 0.14898(15) 0.0332(5) Uani 1 1 d . . . 
N2 N 0.10517(16) 0.18517(10) 0.25053(15) 0.0289(5) Uani 1 1 d . . . 
N3 N 0.33692(16) 0.11976(10) 0.39386(15) 0.0291(5) Uani 1 1 d . . . 
N4 N 0.33606(18) -0.00838(12) 0.41834(17) 0.0370(6) Uani 1 1 d . . . 
N5 N 0.02542(18) -0.04182(11) 0.20868(16) 0.0337(5) Uani 1 1 d . . . 
C1 C 0.1385(2) -0.10844(12) 0.41658(17) 0.0282(5) Uani 1 1 d . . . 
H1A H 0.1987 -0.1085 0.4432 0.034 Uiso 1 1 calc R . . 
H1B H 0.0986 -0.1322 0.4514 0.034 Uiso 1 1 calc R . . 
C1' C -0.2659(17) 0.2092(12) 0.2953(15) 0.073(7) Uani 0.212(8) 1 d PU A 2 
H1'1 H -0.3194 0.2336 0.2990 0.110 Uiso 0.212(8) 1 calc PR A 2 
H1'2 H -0.2834 0.1704 0.2770 0.110 Uiso 0.212(8) 1 calc PR A 2 
H1'3 H -0.2243 0.2260 0.2554 0.110 Uiso 0.212(8) 1 calc PR A 2 
C2 C 0.3054(2) 0.16847(13) 0.52224(19) 0.0338(6) Uani 1 1 d . . . 
H2 H 0.2689 0.1733 0.5696 0.041 Uiso 1 1 calc R . . 
C2' C -0.3024(15) 0.1858(10) 0.4358(15) 0.067(6) Uani 0.212(8) 1 d PU A 2 
H2'1 H -0.3437 0.2180 0.4454 0.101 Uiso 0.212(8) 1 calc PR A 2 
H2'2 H -0.2742 0.1743 0.4885 0.101 Uiso 0.212(8) 1 calc PR A 2 
H2'3 H -0.3357 0.1530 0.4124 0.101 Uiso 0.212(8) 1 calc PR A 2 
C3 C 0.2836(2) 0.00953(13) 0.18203(18) 0.0319(6) Uani 1 1 d . . . 
C3' C -0.1973(14) 0.2668(9) 0.4087(15) 0.059(5) Uani 0.212(8) 1 d PU A 2 
H3'1 H -0.1494 0.2837 0.3755 0.089 Uiso 0.212(8) 1 calc PR A 2 
H3'2 H -0.1761 0.2617 0.4660 0.089 Uiso 0.212(8) 1 calc PR A 2 
H3'3 H -0.2494 0.2926 0.4079 0.089 Uiso 0.212(8) 1 calc PR A 2 
C4 C 0.09629(19) 0.20259(12) 0.50439(18) 0.0290(5) Uani 1 1 d . . . 
C5 C -0.0432(2) 0.08542(13) 0.20431(17) 0.0298(6) Uani 1 1 d . . . 
C6 C 0.3807(2) 0.20179(14) 0.5109(2) 0.0388(7) Uani 1 1 d . . . 
H6 H 0.3964 0.2302 0.5510 0.047 Uiso 1 1 calc R . . 
C7 C 0.2167(3) -0.12464(14) 0.2805(2) 0.0420(7) Uani 1 1 d . . . 
H7 H 0.2611 -0.0974 0.2970 0.050 Uiso 1 1 calc R . . 
C8 C -0.1278(2) 0.10607(15) 0.18144(19) 0.0374(7) Uani 1 1 d . . . 
H8 H -0.1734 0.1120 0.2211 0.045 Uiso 1 1 calc R . . 
C9 C -0.2252(2) 0.20591(14) 0.3710(2) 0.0407(7) Uani 1 1 d . . . 
C10 C 0.0945(2) 0.26544(13) 0.5354(2) 0.0366(7) Uani 1 1 d . . . 
C11 C 0.2494(2) 0.16078(15) 0.1963(2) 0.0406(7) Uani 1 1 d . . . 
H11 H 0.2988 0.1350 0.1937 0.049 Uiso 1 1 calc R . . 
C12 C 0.3847(3) -0.04175(19) 0.4420(3) 0.0593(11) Uani 1 1 d . . . 
C13 C 0.0822(3) -0.17615(17) 0.3074(2) 0.0529(10) Uani 1 1 d . . . 
H13 H 0.0328 -0.1844 0.3420 0.064 Uiso 1 1 calc R . . 
C14 C -0.2199(2) -0.03743(14) 0.32172(19) 0.0356(7) Uani 1 1 d . . . 
C15 C 0.0048(3) 0.08747(17) 0.0694(2) 0.0455(8) Uani 1 1 d . . . 
C16 C -0.1456(2) 0.16378(13) 0.37351(18) 0.0315(6) Uani 1 1 d . A . 
C17 C 0.2477(3) 0.21205(17) 0.1521(2) 0.0511(9) Uani 1 1 d . . . 
H17 H 0.2970 0.2218 0.1180 0.061 Uiso 1 1 calc R . . 
C18 C -0.0019(3) 0.28588(17) 0.5260(3) 0.0593(11) Uani 1 1 d . . . 
H18A H -0.0220 0.2806 0.4683 0.089 Uiso 1 1 calc R . . 
H18B H -0.0056 0.3269 0.5406 0.089 Uiso 1 1 calc R . . 
H18C H -0.0404 0.2634 0.5628 0.089 Uiso 1 1 calc R . . 
C19 C 0.3008(3) -0.03291(18) 0.0386(2) 0.0509(9) Uani 1 1 d . . . 
H19A H 0.3439 -0.0424 -0.0047 0.076 Uiso 1 1 calc R . . 
H19B H 0.2556 -0.0062 0.0162 0.076 Uiso 1 1 calc R . . 
H19C H 0.2714 -0.0683 0.0573 0.076 Uiso 1 1 calc R . . 
C20 C 0.1267(3) 0.26978(16) 0.6254(2) 0.0497(9) Uani 1 1 d . . . 
H20A H 0.1195 0.3096 0.6449 0.075 Uiso 1 1 calc R . . 
H20B H 0.1901 0.2588 0.6291 0.075 Uiso 1 1 calc R . . 
H20C H 0.0913 0.2437 0.6599 0.075 Uiso 1 1 calc R . . 
C21 C 0.4092(2) 0.15263(14) 0.3858(2) 0.0348(6) Uani 1 1 d . . . 
C22 C -0.0246(3) -0.0777(2) 0.2064(3) 0.0567(10) Uani 1 1 d . . . 
C23 C 0.1453(2) -0.13663(12) 0.33245(19) 0.0346(6) Uani 1 1 d . . . 
C24 C 0.1764(3) 0.24896(16) 0.1566(2) 0.0490(9) Uani 1 1 d . . . 
H24 H 0.1749 0.2837 0.1254 0.059 Uiso 1 1 calc R . . 
C25 C 0.4345(2) 0.19447(14) 0.4414(2) 0.0394(7) Uani 1 1 d . . . 
H25 H 0.4864 0.2175 0.4330 0.047 Uiso 1 1 calc R . . 
C26 C 0.1073(2) 0.23434(14) 0.2074(2) 0.0371(7) Uani 1 1 d . . . 
C27 C -0.0759(3) 0.1078(2) 0.0404(2) 0.0574(11) Uani 1 1 d . . . 
H27 H -0.0862 0.1150 -0.0170 0.069 Uiso 1 1 calc R . . 
C28 C 0.1546(3) 0.30272(16) 0.4815(3) 0.0586(11) Uani 1 1 d . . . 
H28A H 0.1553 0.3424 0.5028 0.088 Uiso 1 1 calc R . . 
H28B H 0.1315 0.3027 0.4243 0.088 Uiso 1 1 calc R . . 
H28C H 0.2157 0.2871 0.4826 0.088 Uiso 1 1 calc R . . 
C29 C -0.3063(3) 0.1763(2) 0.3335(4) 0.0582(16) Uani 0.788(8) 1 d P A 1 
H29A H -0.3567 0.2034 0.3315 0.087 Uiso 0.788(8) 1 calc PR A 1 
H29B H -0.3223 0.1429 0.3676 0.087 Uiso 0.788(8) 1 calc PR A 1 
H29C H -0.2926 0.1634 0.2772 0.087 Uiso 0.788(8) 1 calc PR A 1 
C30 C -0.1417(3) 0.11745(18) 0.0982(2) 0.0500(9) Uani 1 1 d . . . 
H30 H -0.1981 0.1323 0.0803 0.060 Uiso 1 1 calc R . . 
C31 C 0.3502(2) -0.00442(16) 0.1122(2) 0.0419(7) Uani 1 1 d . . . 
C32 C -0.3125(3) -0.03897(18) 0.2790(3) 0.0615(12) Uani 1 1 d . . . 
C33 C -0.3121(4) -0.0077(3) 0.1985(3) 0.0859(19) Uani 1 1 d . . . 
H33A H -0.2721 -0.0275 0.1600 0.129 Uiso 1 1 calc R . . 
H33B H -0.2910 0.0320 0.2074 0.129 Uiso 1 1 calc R . . 
H33C H -0.3731 -0.0069 0.1749 0.129 Uiso 1 1 calc R . . 
C34 C -0.0946(4) -0.1230(2) 0.2074(3) 0.0757(14) Uani 1 1 d . . . 
H34A H -0.1021 -0.1370 0.2643 0.114 Uiso 1 1 calc R . . 
H34B H -0.0766 -0.1552 0.1719 0.114 Uiso 1 1 calc R . . 
H34C H -0.1515 -0.1069 0.1869 0.114 Uiso 1 1 calc R . . 
C35 C 0.3921(4) 0.0525(2) 0.0846(3) 0.0768(16) Uani 1 1 d . . . 
H35A H 0.4216 0.0712 0.1323 0.115 Uiso 1 1 calc R . . 
H35B H 0.3452 0.0780 0.0623 0.115 Uiso 1 1 calc R . . 
H35C H 0.4365 0.0449 0.0416 0.115 Uiso 1 1 calc R . . 
C36 C 0.2230(3) -0.15223(17) 0.2048(2) 0.0571(11) Uani 1 1 d . . . 
H36 H 0.2714 -0.1434 0.1692 0.069 Uiso 1 1 calc R . . 
C37 C 0.1604(4) -0.1922(2) 0.1806(3) 0.0727(15) Uani 1 1 d . . . 
H37 H 0.1657 -0.2114 0.1288 0.087 Uiso 1 1 calc R . . 
C38 C 0.0900(4) -0.2043(2) 0.2314(3) 0.0780(17) Uani 1 1 d . . . 
H38 H 0.0463 -0.2320 0.2149 0.094 Uiso 1 1 calc R . . 
C39 C 0.4227(3) -0.0451(2) 0.1457(3) 0.0558(10) Uani 1 1 d . . . 
H39A H 0.3956 -0.0822 0.1602 0.084 Uiso 1 1 calc R . . 
H39B H 0.4508 -0.0280 0.1952 0.084 Uiso 1 1 calc R . . 
H39C H 0.4682 -0.0511 0.1033 0.084 Uiso 1 1 calc R . . 
C40 C 0.4472(4) -0.0870(3) 0.4727(4) 0.101(2) Uani 1 1 d . . . 
H40A H 0.4444 -0.0891 0.5334 0.151 Uiso 1 1 calc R . . 
H40B H 0.5084 -0.0774 0.4563 0.151 Uiso 1 1 calc R . . 
H40C H 0.4301 -0.1244 0.4489 0.151 Uiso 1 1 calc R . . 
C41 C -0.2431(5) 0.2250(3) 0.4547(4) 0.083(3) Uani 0.788(8) 1 d P A 1 
H41A H -0.2915 0.2536 0.4536 0.125 Uiso 0.788(8) 1 calc PR A 1 
H41B H -0.1888 0.2423 0.4788 0.125 Uiso 0.788(8) 1 calc PR A 1 
H41C H -0.2612 0.1918 0.4884 0.125 Uiso 0.788(8) 1 calc PR A 1 
C42 C -0.2012(4) 0.2572(3) 0.3132(5) 0.079(2) Uani 0.788(8) 1 d P A 1 
H42A H -0.1927 0.2429 0.2567 0.119 Uiso 0.788(8) 1 calc PR A 1 
H42B H -0.1457 0.2755 0.3332 0.119 Uiso 0.788(8) 1 calc PR A 1 
H42C H -0.2500 0.2855 0.3134 0.119 Uiso 0.788(8) 1 calc PR A 1 
C43 C -0.3469(3) -0.09990(18) 0.2685(3) 0.0612(12) Uani 1 1 d . . . 
H43A H -0.4062 -0.0990 0.2416 0.092 Uiso 1 1 calc R . . 
H43B H -0.3514 -0.1183 0.3230 0.092 Uiso 1 1 calc R . . 
H43C H -0.3053 -0.1219 0.2341 0.092 Uiso 1 1 calc R . . 
C44 C 0.28437(19) 0.12692(12) 0.46115(18) 0.0284(5) Uani 1 1 d . . . 
C45 C 0.1751(2) 0.14889(12) 0.24462(17) 0.0287(5) Uani 1 1 d . . . 
C46 C -0.3787(4) -0.0056(3) 0.3396(5) 0.106(2) Uani 1 1 d . . . 
H46A H -0.3521 0.0315 0.3556 0.160 Uiso 1 1 calc R . . 
H46B H -0.3884 -0.0290 0.3894 0.160 Uiso 1 1 calc R . . 
H46C H -0.4362 0.0011 0.3111 0.160 Uiso 1 1 calc R . . 
 
loop_ 
 _atom_site_aniso_label 
 _atom_site_aniso_U_11 
 _atom_site_aniso_U_22 
 _atom_site_aniso_U_33 
 _atom_site_aniso_U_23 
 _atom_site_aniso_U_13 
 _atom_site_aniso_U_12 
Ni1 0.02982(18) 0.02910(18) 0.01996(16) 0.00270(13) -0.00010(13) -0.00326(14) 
Ni2 0.02741(17) 0.02388(16) 0.02050(15) 0.00398(12) -0.00230(12) -0.00343(13) 
Ni3 0.02783(17) 0.02273(16) 0.01916(15) 0.00166(11) -0.00103(12) -0.00239(12) 
Ni4 0.02612(17) 0.02665(17) 0.02286(16) 0.00220(12) 0.00037(13) -0.00039(13) 
Ni5 0.02772(17) 0.02440(17) 0.02256(16) 0.00385(12) -0.00073(13) -0.00182(13) 
Cl1 0.0711(7) 0.1407(12) 0.0252(4) 0.0163(5) 0.0093(4) 0.0191(7) 
Cl2 0.0329(4) 0.0603(5) 0.0503(5) 0.0058(4) 0.0095(3) -0.0061(4) 
Cl3 0.0601(6) 0.0390(4) 0.0619(6) 0.0188(4) 0.0070(4) 0.0132(4) 
P1 0.0281(3) 0.0215(3) 0.0195(3) 0.0019(2) 0.0012(2) -0.0009(2) 
F1 0.0283(8) 0.0246(7) 0.0221(7) 0.0035(6) -0.0022(6) -0.0024(6) 
O1 0.0287(10) 0.0267(9) 0.0259(9) 0.0058(7) -0.0004(7) -0.0038(7) 
O2 0.0304(10) 0.0224(9) 0.0211(8) 0.0008(7) 0.0008(7) -0.0018(7) 
O3 0.0339(10) 0.0265(10) 0.0276(10) 0.0007(7) 0.0035(8) -0.0023(8) 
O4 0.0285(9) 0.0226(9) 0.0201(8) 0.0025(6) 0.0009(7) -0.0010(7) 
O5 0.0290(9) 0.0242(9) 0.0203(8) 0.0025(7) 0.0014(7) -0.0019(7) 
O6 0.0307(10) 0.0311(10) 0.0195(8) 0.0043(7) -0.0023(7) -0.0033(8) 
O7 0.0278(10) 0.0278(9) 0.0261(9) -0.0011(7) 0.0023(7) -0.0044(7) 
O8 0.0373(11) 0.0367(11) 0.0329(11) 0.0101(9) -0.0103(9) -0.0107(9) 
O9 0.0342(11) 0.0399(12) 0.0307(10) -0.0017(9) 0.0047(8) 0.0004(9) 
O10 0.0300(10) 0.0303(10) 0.0419(12) 0.0064(9) -0.0008(9) 0.0011(8) 
O11 0.0370(11) 0.0283(10) 0.0282(10) 0.0019(8) -0.0012(8) -0.0048(8) 
O12 0.0388(12) 0.0328(11) 0.0283(10) 0.0040(8) -0.0072(9) -0.0068(9) 
O13 0.0315(10) 0.0313(10) 0.0326(10) 0.0070(8) -0.0014(8) -0.0003(8) 
O14 0.0365(11) 0.0422(12) 0.0265(10) -0.0027(8) 0.0030(8) -0.0016(9) 
N1 0.0366(13) 0.0415(14) 0.0215(11) 0.0046(10) -0.0037(9) -0.0030(11) 
N2 0.0317(12) 0.0277(11) 0.0274(11) 0.0049(9) -0.0016(9) -0.0032(9) 
N3 0.0259(11) 0.0303(12) 0.0312(12) 0.0030(9) -0.0005(9) -0.0007(9) 
N4 0.0347(14) 0.0333(13) 0.0428(15) 0.0056(11) -0.0056(11) 0.0033(11) 
N5 0.0389(14) 0.0331(13) 0.0289(12) -0.0001(10) -0.0061(10) -0.0084(11) 
C1 0.0335(14) 0.0246(13) 0.0266(13) 0.0033(10) 0.0037(11) 0.0020(10) 
C1' 0.068(10) 0.080(10) 0.071(10) 0.010(8) -0.016(8) 0.031(8) 
C2 0.0368(16) 0.0318(15) 0.0328(15) -0.0006(11) -0.0035(12) -0.0052(12) 
C2' 0.061(9) 0.064(9) 0.077(10) 0.012(8) 0.002(8) 0.015(7) 
C3 0.0392(16) 0.0304(14) 0.0261(13) 0.0022(10) 0.0059(11) 0.0003(12) 
C3' 0.054(8) 0.047(8) 0.076(10) -0.003(7) 0.003(7) 0.004(7) 
C4 0.0290(13) 0.0271(13) 0.0309(14) 0.0007(10) -0.0010(11) -0.0015(10) 
C5 0.0341(15) 0.0319(14) 0.0234(12) 0.0047(10) -0.0043(11) -0.0043(11) 
C6 0.0384(17) 0.0351(16) 0.0427(17) 0.0010(13) -0.0114(14) -0.0098(13) 
C7 0.050(2) 0.0317(16) 0.0443(18) -0.0014(13) 0.0150(15) -0.0013(14) 
C8 0.0364(16) 0.0450(18) 0.0306(15) 0.0042(12) -0.0072(12) 0.0025(13) 
C9 0.0309(15) 0.0353(16) 0.056(2) 0.0074(14) -0.0025(14) 0.0047(12) 
C10 0.0496(19) 0.0250(14) 0.0352(15) -0.0015(11) 0.0040(13) -0.0058(12) 
C11 0.0383(17) 0.0430(18) 0.0406(17) 0.0106(14) 0.0088(13) -0.0039(14) 
C12 0.058(2) 0.052(2) 0.068(3) 0.014(2) -0.010(2) -0.0048(19) 
C13 0.065(2) 0.051(2) 0.0431(19) -0.0140(16) 0.0193(18) -0.0216(18) 
C14 0.0393(16) 0.0365(16) 0.0308(14) 0.0080(12) -0.0108(12) -0.0111(13) 
C15 0.053(2) 0.060(2) 0.0238(14) 0.0085(14) 0.0001(14) 0.0025(17) 
C16 0.0331(15) 0.0325(14) 0.0288(13) 0.0046(11) -0.0028(11) 0.0010(11) 
C17 0.053(2) 0.048(2) 0.052(2) 0.0206(17) 0.0173(17) -0.0046(17) 
C18 0.064(3) 0.042(2) 0.072(3) -0.0102(19) -0.003(2) 0.0161(19) 
C19 0.060(2) 0.065(2) 0.0276(16) -0.0079(15) 0.0083(15) 0.0102(19) 
C20 0.067(2) 0.0423(19) 0.0402(18) -0.0099(15) -0.0007(17) -0.0142(17) 
C21 0.0284(14) 0.0363(16) 0.0397(16) 0.0104(12) 0.0002(12) -0.0015(12) 
C22 0.063(3) 0.063(3) 0.044(2) -0.0053(18) 0.0028(18) -0.002(2) 
C23 0.0488(18) 0.0233(13) 0.0319(14) -0.0014(11) 0.0095(13) 0.0007(12) 
C24 0.058(2) 0.0407(18) 0.049(2) 0.0204(15) 0.0060(17) -0.0058(16) 
C25 0.0318(15) 0.0378(17) 0.0486(19) 0.0082(14) -0.0078(13) -0.0105(13) 
C26 0.0416(17) 0.0308(15) 0.0387(16) 0.0109(12) -0.0011(13) -0.0011(12) 
C27 0.061(2) 0.083(3) 0.0285(17) 0.0140(17) -0.0097(16) 0.006(2) 
C28 0.094(3) 0.0304(17) 0.051(2) -0.0045(15) 0.014(2) -0.0221(19) 
C29 0.037(2) 0.051(3) 0.086(4) -0.001(3) -0.014(3) 0.006(2) 
C30 0.045(2) 0.067(2) 0.0372(18) 0.0106(17) -0.0134(15) 0.0057(18) 
C31 0.0456(19) 0.0468(19) 0.0338(16) -0.0038(14) 0.0134(14) -0.0015(15) 
C32 0.067(3) 0.053(2) 0.064(3) 0.0177(19) -0.030(2) -0.021(2) 
C33 0.077(3) 0.110(4) 0.070(3) 0.047(3) -0.043(3) -0.040(3) 
C34 0.075(3) 0.073(3) 0.079(3) -0.010(3) 0.011(3) -0.026(3) 
C35 0.103(4) 0.059(3) 0.069(3) -0.009(2) 0.056(3) -0.022(3) 
C36 0.079(3) 0.043(2) 0.050(2) -0.0079(16) 0.035(2) -0.0065(19) 
C37 0.109(4) 0.062(3) 0.048(2) -0.024(2) 0.035(2) -0.030(3) 
C38 0.107(4) 0.071(3) 0.056(3) -0.032(2) 0.030(3) -0.049(3) 
C39 0.041(2) 0.079(3) 0.049(2) -0.0160(19) 0.0071(16) 0.0090(19) 
C40 0.095(4) 0.081(4) 0.125(5) 0.034(4) -0.018(4) 0.034(3) 
C41 0.084(5) 0.102(6) 0.064(4) -0.030(4) -0.018(3) 0.060(5) 
C42 0.045(3) 0.059(4) 0.135(6) 0.053(4) 0.008(3) 0.016(3) 
C43 0.056(2) 0.050(2) 0.077(3) 0.005(2) -0.032(2) -0.0208(19) 
C44 0.0274(13) 0.0265(13) 0.0312(14) 0.0041(10) -0.0029(11) -0.0022(10) 
C45 0.0328(14) 0.0280(13) 0.0251(13) 0.0041(10) -0.0017(10) -0.0057(11) 
C46 0.057(3) 0.116(5) 0.146(6) -0.050(5) -0.023(3) 0.014(3) 
 
_geom_special_details 
; 
 All esds (except the esd in the dihedral angle between two l.s. planes) 
 are estimated using the full covariance matrix.  The cell esds are taken 
 into account individually in the estimation of esds in distances, angles 
 and torsion angles; correlations between esds in cell parameters are only 
 used when they are defined by crystal symmetry.  An approximate (isotropic) 
 treatment of cell esds is used for estimating esds involving l.s. planes. 
; 
 
loop_ 
 _geom_bond_atom_site_label_1 
 _geom_bond_atom_site_label_2 
 _geom_bond_distance 
 _geom_bond_site_symmetry_2 
 _geom_bond_publ_flag 
Ni1 O14 1.972(2) . ? 
Ni1 O5 2.0309(18) . ? 
Ni1 N5 2.044(3) . ? 
Ni1 O1 2.110(2) . ? 
Ni1 N1 2.116(2) . ? 
Ni1 O6 2.140(2) . ? 
Ni2 O8 1.983(2) . ? 
Ni2 F1 2.0197(15) . ? 
Ni2 O13 2.044(2) . ? 
Ni2 O4 2.0609(18) 3_556 ? 
Ni2 O6 2.0924(19) . ? 
Ni2 O2 2.1476(19) . ? 
Ni3 O12 2.023(2) 3_556 ? 
Ni3 F1 2.0260(15) . ? 
Ni3 O7 2.0420(19) . ? 
Ni3 O3 2.046(2) . ? 
Ni3 O4 2.0994(18) . ? 
Ni3 O2 2.1569(19) 3_556 ? 
Ni4 O9 1.987(2) . ? 
Ni4 O5 2.0446(19) . ? 
Ni4 O1 2.0701(19) . ? 
Ni4 O7 2.0708(19) . ? 
Ni4 N4 2.078(3) . ? 
Ni4 N3 2.112(2) . ? 
Ni5 O10 1.976(2) . ? 
Ni5 O11 1.984(2) . ? 
Ni5 F1 1.9891(15) . ? 
Ni5 N2 2.094(2) . ? 
Ni5 O6 2.1408(19) . ? 
Ni5 O1 2.233(2) . ? 
Cl1 C15 1.735(4) . ? 
Cl2 C21 1.743(3) . ? 
Cl3 C26 1.732(3) . ? 
P1 O2 1.533(2) . ? 
P1 O4 1.5356(19) . ? 
P1 O5 1.5402(19) . ? 
P1 C1 1.802(3) . ? 
O1 C45 1.329(3) . ? 
O2 Ni3 2.1570(19) 3_556 ? 
O3 C4 1.257(3) . ? 
O4 Ni2 2.0609(18) 3_556 ? 
O6 C5 1.335(3) . ? 
O7 C44 1.302(3) . ? 
O8 C14 1.242(4) . ? 
O9 C3 1.266(4) . ? 
O10 C16 1.259(4) . ? 
O11 C4 1.260(3) . ? 
O12 C14 1.258(4) . ? 
O12 Ni3 2.023(2) 3_556 ? 
O13 C16 1.255(4) . ? 
O14 C3 1.254(4) . ? 
N1 C15 1.332(4) . ? 
N1 C5 1.344(4) . ? 
N2 C26 1.335(4) . ? 
N2 C45 1.344(4) . ? 
N3 C21 1.327(4) . ? 
N3 C44 1.356(4) . ? 
N4 C12 1.123(5) . ? 
N5 C22 1.118(5) . ? 
C1 C23 1.510(4) . ? 
C1 H1A 0.9900 . ? 
C1 H1B 0.9900 . ? 
C1' C9 1.36(2) . ? 
C1' H1'1 0.9800 . ? 
C1' H1'2 0.9800 . ? 
C1' H1'3 0.9800 . ? 
C2 C6 1.377(4) . ? 
C2 C44 1.409(4) . ? 
C2 H2 0.9500 . ? 
C2' C9 1.63(2) . ? 
C2' H2'1 0.9800 . ? 
C2' H2'2 0.9800 . ? 
C2' H2'3 0.9800 . ? 
C3 C31 1.545(4) . ? 
C3' C9 1.59(2) . ? 
C3' H3'1 0.9800 . ? 
C3' H3'2 0.9800 . ? 
C3' H3'3 0.9800 . ? 
C4 C10 1.539(4) . ? 
C5 C8 1.394(4) . ? 
C6 C25 1.397(5) . ? 
C6 H6 0.9500 . ? 
C7 C36 1.382(5) . ? 
C7 C23 1.390(4) . ? 
C7 H7 0.9500 . ? 
C8 C30 1.380(4) . ? 
C8 H8 0.9500 . ? 
C9 C41 1.448(7) . ? 
C9 C29 1.510(6) . ? 
C9 C16 1.536(4) . ? 
C9 C42 1.554(6) . ? 
C10 C18 1.519(5) . ? 
C10 C20 1.525(5) . ? 
C10 C28 1.526(5) . ? 
C11 C17 1.385(5) . ? 
C11 C45 1.390(4) . ? 
C11 H11 0.9500 . ? 
C12 C40 1.483(6) . ? 
C13 C23 1.370(5) . ? 
C13 C38 1.393(5) . ? 
C13 H13 0.9500 . ? 
C14 C32 1.536(5) . ? 
C15 C27 1.370(5) . ? 
C17 C24 1.367(5) . ? 
C17 H17 0.9500 . ? 
C18 H18A 0.9800 . ? 
C18 H18B 0.9800 . ? 
C18 H18C 0.9800 . ? 
C19 C31 1.537(5) . ? 
C19 H19A 0.9800 . ? 
C19 H19B 0.9800 . ? 
C19 H19C 0.9800 . ? 
C20 H20A 0.9800 . ? 
C20 H20B 0.9800 . ? 
C20 H20C 0.9800 . ? 
C21 C25 1.369(5) . ? 
C22 C34 1.480(6) . ? 
C24 C26 1.366(5) . ? 
C24 H24 0.9500 . ? 
C25 H25 0.9500 . ? 
C27 C30 1.380(6) . ? 
C27 H27 0.9500 . ? 
C28 H28A 0.9800 . ? 
C28 H28B 0.9800 . ? 
C28 H28C 0.9800 . ? 
C29 H29A 0.9800 . ? 
C29 H29B 0.9800 . ? 
C29 H29C 0.9800 . ? 
C30 H30 0.9500 . ? 
C31 C35 1.527(5) . ? 
C31 C39 1.527(6) . ? 
C32 C33 1.487(6) . ? 
C32 C43 1.510(5) . ? 
C32 C46 1.597(8) . ? 
C33 H33A 0.9800 . ? 
C33 H33B 0.9800 . ? 
C33 H33C 0.9800 . ? 
C34 H34A 0.9800 . ? 
C34 H34B 0.9800 . ? 
C34 H34C 0.9800 . ? 
C35 H35A 0.9800 . ? 
C35 H35B 0.9800 . ? 
C35 H35C 0.9800 . ? 
C36 C37 1.368(6) . ? 
C36 H36 0.9500 . ? 
C37 C38 1.369(6) . ? 
C37 H37 0.9500 . ? 
C38 H38 0.9500 . ? 
C39 H39A 0.9800 . ? 
C39 H39B 0.9800 . ? 
C39 H39C 0.9800 . ? 
C40 H40A 0.9800 . ? 
C40 H40B 0.9800 . ? 
C40 H40C 0.9800 . ? 
C41 H41A 0.9800 . ? 
C41 H41B 0.9800 . ? 
C41 H41C 0.9800 . ? 
C42 H42A 0.9800 . ? 
C42 H42B 0.9800 . ? 
C42 H42C 0.9800 . ? 
C43 H43A 0.9800 . ? 
C43 H43B 0.9800 . ? 
C43 H43C 0.9800 . ? 
C46 H46A 0.9800 . ? 
C46 H46B 0.9800 . ? 
C46 H46C 0.9800 . ? 
 
loop_ 
 _geom_angle_atom_site_label_1 
 _geom_angle_atom_site_label_2 
 _geom_angle_atom_site_label_3 
 _geom_angle 
 _geom_angle_site_symmetry_1 
 _geom_angle_site_symmetry_3 
 _geom_angle_publ_flag 
O14 Ni1 O5 98.63(8) . . ? 
O14 Ni1 N5 94.08(10) . . ? 
O5 Ni1 N5 94.15(9) . . ? 
O14 Ni1 O1 96.34(8) . . ? 
O5 Ni1 O1 77.77(7) . . ? 
N5 Ni1 O1 167.65(9) . . ? 
O14 Ni1 N1 99.91(10) . . ? 
O5 Ni1 N1 161.18(9) . . ? 
N5 Ni1 N1 87.74(10) . . ? 
O1 Ni1 N1 96.95(9) . . ? 
O14 Ni1 O6 161.95(8) . . ? 
O5 Ni1 O6 98.48(7) . . ? 
N5 Ni1 O6 90.40(9) . . ? 
O1 Ni1 O6 81.71(8) . . ? 
N1 Ni1 O6 62.76(9) . . ? 
O8 Ni2 F1 167.68(7) . . ? 
O8 Ni2 O13 84.85(9) . . ? 
F1 Ni2 O13 91.82(7) . . ? 
O8 Ni2 O4 100.49(8) . 3_556 ? 
F1 Ni2 O4 91.57(7) . 3_556 ? 
O13 Ni2 O4 94.18(8) . 3_556 ? 
O8 Ni2 O6 89.81(8) . . ? 
F1 Ni2 O6 78.40(7) . . ? 
O13 Ni2 O6 91.50(8) . . ? 
O4 Ni2 O6 168.63(8) 3_556 . ? 
O8 Ni2 O2 95.76(8) . . ? 
F1 Ni2 O2 88.94(7) . . ? 
O13 Ni2 O2 173.24(8) . . ? 
O4 Ni2 O2 79.08(7) 3_556 . ? 
O6 Ni2 O2 95.22(7) . . ? 
O12 Ni3 F1 174.18(7) 3_556 . ? 
O12 Ni3 O7 85.44(8) 3_556 . ? 
F1 Ni3 O7 92.44(7) . . ? 
O12 Ni3 O3 88.16(8) 3_556 . ? 
F1 Ni3 O3 86.60(7) . . ? 
O7 Ni3 O3 94.31(8) . . ? 
O12 Ni3 O4 98.64(8) 3_556 . ? 
F1 Ni3 O4 86.58(7) . . ? 
O7 Ni3 O4 85.79(7) . . ? 
O3 Ni3 O4 173.18(8) . . ? 
O12 Ni3 O2 95.03(8) 3_556 3_556 ? 
F1 Ni3 O2 88.52(7) . 3_556 ? 
O7 Ni3 O2 163.72(7) . 3_556 ? 
O3 Ni3 O2 101.97(7) . 3_556 ? 
O4 Ni3 O2 78.04(7) . 3_556 ? 
O9 Ni4 O5 99.05(8) . . ? 
O9 Ni4 O1 94.27(8) . . ? 
O5 Ni4 O1 78.39(7) . . ? 
O9 Ni4 O7 165.91(8) . . ? 
O5 Ni4 O7 94.97(7) . . ? 
O1 Ni4 O7 87.11(8) . . ? 
O9 Ni4 N4 87.78(10) . . ? 
O5 Ni4 N4 95.14(9) . . ? 
O1 Ni4 N4 173.43(9) . . ? 
O7 Ni4 N4 92.41(10) . . ? 
O9 Ni4 N3 102.34(9) . . ? 
O5 Ni4 N3 157.90(9) . . ? 
O1 Ni4 N3 94.47(8) . . ? 
O7 Ni4 N3 63.57(8) . . ? 
N4 Ni4 N3 91.18(10) . . ? 
O10 Ni5 O11 91.12(9) . . ? 
O10 Ni5 F1 96.65(8) . . ? 
O11 Ni5 F1 93.01(7) . . ? 
O10 Ni5 N2 101.51(9) . . ? 
O11 Ni5 N2 89.07(9) . . ? 
F1 Ni5 N2 161.68(8) . . ? 
O10 Ni5 O6 92.78(8) . . ? 
O11 Ni5 O6 170.48(8) . . ? 
F1 Ni5 O6 77.92(7) . . ? 
N2 Ni5 O6 98.64(8) . . ? 
O10 Ni5 O1 159.12(8) . . ? 
O11 Ni5 O1 100.13(8) . . ? 
F1 Ni5 O1 100.23(7) . . ? 
N2 Ni5 O1 61.52(8) . . ? 
O6 Ni5 O1 78.93(7) . . ? 
O2 P1 O4 115.02(11) . . ? 
O2 P1 O5 109.65(10) . . ? 
O4 P1 O5 110.29(10) . . ? 
O2 P1 C1 108.62(12) . . ? 
O4 P1 C1 105.54(12) . . ? 
O5 P1 C1 107.38(12) . . ? 
Ni5 F1 Ni2 99.98(7) . . ? 
Ni5 F1 Ni3 119.54(8) . . ? 
Ni2 F1 Ni3 139.39(8) . . ? 
C45 O1 Ni4 131.71(18) . . ? 
C45 O1 Ni1 118.40(17) . . ? 
Ni4 O1 Ni1 91.91(8) . . ? 
C45 O1 Ni5 89.82(16) . . ? 
Ni4 O1 Ni5 124.06(9) . . ? 
Ni1 O1 Ni5 98.38(8) . . ? 
P1 O2 Ni2 121.66(10) . . ? 
P1 O2 Ni3 127.91(11) . 3_556 ? 
Ni2 O2 Ni3 90.01(7) . 3_556 ? 
C4 O3 Ni3 125.28(18) . . ? 
P1 O4 Ni2 126.52(11) . 3_556 ? 
P1 O4 Ni3 125.54(11) . . ? 
Ni2 O4 Ni3 94.05(7) 3_556 . ? 
P1 O5 Ni1 130.32(11) . . ? 
P1 O5 Ni4 130.24(11) . . ? 
Ni1 O5 Ni4 95.01(7) . . ? 
C5 O6 Ni2 133.42(18) . . ? 
C5 O6 Ni1 91.51(17) . . ? 
Ni2 O6 Ni1 119.82(9) . . ? 
C5 O6 Ni5 115.81(17) . . ? 
Ni2 O6 Ni5 92.98(7) . . ? 
Ni1 O6 Ni5 100.35(8) . . ? 
C44 O7 Ni3 135.61(18) . . ? 
C44 O7 Ni4 93.92(16) . . ? 
Ni3 O7 Ni4 130.48(10) . . ? 
C14 O8 Ni2 128.62(19) . . ? 
C3 O9 Ni4 128.6(2) . . ? 
C16 O10 Ni5 127.5(2) . . ? 
C4 O11 Ni5 129.94(19) . . ? 
C14 O12 Ni3 128.15(19) . 3_556 ? 
C16 O13 Ni2 129.7(2) . . ? 
C3 O14 Ni1 128.08(19) . . ? 
C15 N1 C5 118.4(3) . . ? 
C15 N1 Ni1 147.6(3) . . ? 
C5 N1 Ni1 92.32(17) . . ? 
C26 N2 C45 118.2(3) . . ? 
C26 N2 Ni5 144.8(2) . . ? 
C45 N2 Ni5 95.51(17) . . ? 
C21 N3 C44 119.1(3) . . ? 
C21 N3 Ni4 150.2(2) . . ? 
C44 N3 Ni4 90.51(17) . . ? 
C12 N4 Ni4 169.4(3) . . ? 
C22 N5 Ni1 166.6(3) . . ? 
C23 C1 P1 114.9(2) . . ? 
C23 C1 H1A 108.5 . . ? 
P1 C1 H1A 108.5 . . ? 
C23 C1 H1B 108.5 . . ? 
P1 C1 H1B 108.5 . . ? 
H1A C1 H1B 107.5 . . ? 
C9 C1' H1'1 109.5 . . ? 
C9 C1' H1'2 109.5 . . ? 
H1'1 C1' H1'2 109.5 . . ? 
C9 C1' H1'3 109.5 . . ? 
H1'1 C1' H1'3 109.5 . . ? 
H1'2 C1' H1'3 109.5 . . ? 
C6 C2 C44 117.6(3) . . ? 
C6 C2 H2 121.2 . . ? 
C44 C2 H2 121.2 . . ? 
C9 C2' H2'1 109.5 . . ? 
C9 C2' H2'2 109.5 . . ? 
H2'1 C2' H2'2 109.5 . . ? 
C9 C2' H2'3 109.5 . . ? 
H2'1 C2' H2'3 109.5 . . ? 
H2'2 C2' H2'3 109.5 . . ? 
O14 C3 O9 125.4(3) . . ? 
O14 C3 C31 118.4(3) . . ? 
O9 C3 C31 116.2(3) . . ? 
C9 C3' H3'1 109.5 . . ? 
C9 C3' H3'2 109.5 . . ? 
H3'1 C3' H3'2 109.5 . . ? 
C9 C3' H3'3 109.5 . . ? 
H3'1 C3' H3'3 109.5 . . ? 
H3'2 C3' H3'3 109.5 . . ? 
O3 C4 O11 126.3(3) . . ? 
O3 C4 C10 118.2(3) . . ? 
O11 C4 C10 115.5(2) . . ? 
O6 C5 N1 111.7(3) . . ? 
O6 C5 C8 125.7(3) . . ? 
N1 C5 C8 122.6(3) . . ? 
C2 C6 C25 121.1(3) . . ? 
C2 C6 H6 119.4 . . ? 
C25 C6 H6 119.4 . . ? 
C36 C7 C23 120.1(3) . . ? 
C36 C7 H7 119.9 . . ? 
C23 C7 H7 119.9 . . ? 
C30 C8 C5 116.6(3) . . ? 
C30 C8 H8 121.7 . . ? 
C5 C8 H8 121.7 . . ? 
C1' C9 C41 137.3(11) . . ? 
C1' C9 C29 47.1(13) . . ? 
C41 C9 C29 110.8(5) . . ? 
C1' C9 C16 113.3(10) . . ? 
C41 C9 C16 108.7(3) . . ? 
C29 C9 C16 109.7(3) . . ? 
C1' C9 C42 61.5(13) . . ? 
C41 C9 C42 111.9(5) . . ? 
C29 C9 C42 107.3(4) . . ? 
C16 C9 C42 108.5(3) . . ? 
C1' C9 C3' 113.9(15) . . ? 
C41 C9 C3' 54.8(9) . . ? 
C29 C9 C3' 139.5(8) . . ? 
C16 C9 C3' 110.8(8) . . ? 
C42 C9 C3' 59.3(9) . . ? 
C1' C9 C2' 106.3(15) . . ? 
C41 C9 C2' 49.5(10) . . ? 
C29 C9 C2' 63.8(10) . . ? 
C16 C9 C2' 110.6(8) . . ? 
C42 C9 C2' 140.5(8) . . ? 
C3' C9 C2' 101.0(13) . . ? 
C18 C10 C20 111.2(3) . . ? 
C18 C10 C28 109.2(3) . . ? 
C20 C10 C28 108.9(3) . . ? 
C18 C10 C4 106.4(3) . . ? 
C20 C10 C4 111.4(3) . . ? 
C28 C10 C4 109.6(3) . . ? 
C17 C11 C45 116.7(3) . . ? 
C17 C11 H11 121.7 . . ? 
C45 C11 H11 121.7 . . ? 
N4 C12 C40 178.6(5) . . ? 
C23 C13 C38 120.5(4) . . ? 
C23 C13 H13 119.8 . . ? 
C38 C13 H13 119.8 . . ? 
O8 C14 O12 125.5(3) . . ? 
O8 C14 C32 115.5(3) . . ? 
O12 C14 C32 118.4(3) . . ? 
N1 C15 C27 123.6(3) . . ? 
N1 C15 Cl1 115.4(3) . . ? 
C27 C15 Cl1 120.9(3) . . ? 
O13 C16 O10 126.2(3) . . ? 
O13 C16 C9 116.8(3) . . ? 
O10 C16 C9 117.0(3) . . ? 
C24 C17 C11 121.2(3) . . ? 
C24 C17 H17 119.4 . . ? 
C11 C17 H17 119.4 . . ? 
C10 C18 H18A 109.5 . . ? 
C10 C18 H18B 109.5 . . ? 
H18A C18 H18B 109.5 . . ? 
C10 C18 H18C 109.5 . . ? 
H18A C18 H18C 109.5 . . ? 
H18B C18 H18C 109.5 . . ? 
C31 C19 H19A 109.5 . . ? 
C31 C19 H19B 109.5 . . ? 
H19A C19 H19B 109.5 . . ? 
C31 C19 H19C 109.5 . . ? 
H19A C19 H19C 109.5 . . ? 
H19B C19 H19C 109.5 . . ? 
C10 C20 H20A 109.5 . . ? 
C10 C20 H20B 109.5 . . ? 
H20A C20 H20B 109.5 . . ? 
C10 C20 H20C 109.5 . . ? 
H20A C20 H20C 109.5 . . ? 
H20B C20 H20C 109.5 . . ? 
N3 C21 C25 124.0(3) . . ? 
N3 C21 Cl2 115.3(2) . . ? 
C25 C21 Cl2 120.7(2) . . ? 
N5 C22 C34 176.0(5) . . ? 
C13 C23 C7 118.9(3) . . ? 
C13 C23 C1 120.0(3) . . ? 
C7 C23 C1 121.1(3) . . ? 
C26 C24 C17 118.0(3) . . ? 
C26 C24 H24 121.0 . . ? 
C17 C24 H24 121.0 . . ? 
C21 C25 C6 117.0(3) . . ? 
C21 C25 H25 121.5 . . ? 
C6 C25 H25 121.5 . . ? 
N2 C26 C24 123.1(3) . . ? 
N2 C26 Cl3 116.5(2) . . ? 
C24 C26 Cl3 120.4(3) . . ? 
C15 C27 C30 117.0(3) . . ? 
C15 C27 H27 121.5 . . ? 
C30 C27 H27 121.5 . . ? 
C10 C28 H28A 109.5 . . ? 
C10 C28 H28B 109.5 . . ? 
H28A C28 H28B 109.5 . . ? 
C10 C28 H28C 109.5 . . ? 
H28A C28 H28C 109.5 . . ? 
H28B C28 H28C 109.5 . . ? 
C9 C29 H29A 109.5 . . ? 
C9 C29 H29B 109.5 . . ? 
C9 C29 H29C 109.5 . . ? 
C8 C30 C27 121.8(3) . . ? 
C8 C30 H30 119.1 . . ? 
C27 C30 H30 119.1 . . ? 
C35 C31 C39 110.2(4) . . ? 
C35 C31 C19 109.9(3) . . ? 
C39 C31 C19 109.8(3) . . ? 
C35 C31 C3 107.5(3) . . ? 
C39 C31 C3 109.2(3) . . ? 
C19 C31 C3 110.2(3) . . ? 
C33 C32 C43 111.3(4) . . ? 
C33 C32 C14 111.5(4) . . ? 
C43 C32 C14 111.9(3) . . ? 
C33 C32 C46 107.9(5) . . ? 
C43 C32 C46 108.0(4) . . ? 
C14 C32 C46 105.9(4) . . ? 
C32 C33 H33A 109.5 . . ? 
C32 C33 H33B 109.5 . . ? 
H33A C33 H33B 109.5 . . ? 
C32 C33 H33C 109.5 . . ? 
H33A C33 H33C 109.5 . . ? 
H33B C33 H33C 109.5 . . ? 
C22 C34 H34A 109.5 . . ? 
C22 C34 H34B 109.5 . . ? 
H34A C34 H34B 109.5 . . ? 
C22 C34 H34C 109.5 . . ? 
H34A C34 H34C 109.5 . . ? 
H34B C34 H34C 109.5 . . ? 
C31 C35 H35A 109.5 . . ? 
C31 C35 H35B 109.5 . . ? 
H35A C35 H35B 109.5 . . ? 
C31 C35 H35C 109.5 . . ? 
H35A C35 H35C 109.5 . . ? 
H35B C35 H35C 109.5 . . ? 
C37 C36 C7 120.6(4) . . ? 
C37 C36 H36 119.7 . . ? 
C7 C36 H36 119.7 . . ? 
C38 C37 C36 119.6(4) . . ? 
C38 C37 H37 120.2 . . ? 
C36 C37 H37 120.2 . . ? 
C37 C38 C13 120.3(4) . . ? 
C37 C38 H38 119.9 . . ? 
C13 C38 H38 119.9 . . ? 
C31 C39 H39A 109.5 . . ? 
C31 C39 H39B 109.5 . . ? 
H39A C39 H39B 109.5 . . ? 
C31 C39 H39C 109.5 . . ? 
H39A C39 H39C 109.5 . . ? 
H39B C39 H39C 109.5 . . ? 
C12 C40 H40A 109.5 . . ? 
C12 C40 H40B 109.5 . . ? 
H40A C40 H40B 109.5 . . ? 
C12 C40 H40C 109.5 . . ? 
H40A C40 H40C 109.5 . . ? 
H40B C40 H40C 109.5 . . ? 
C9 C41 H41A 109.5 . . ? 
C9 C41 H41B 109.5 . . ? 
C9 C41 H41C 109.5 . . ? 
C9 C42 H42A 109.5 . . ? 
C9 C42 H42B 109.5 . . ? 
C9 C42 H42C 109.5 . . ? 
C32 C43 H43A 109.5 . . ? 
C32 C43 H43B 109.5 . . ? 
H43A C43 H43B 109.5 . . ? 
C32 C43 H43C 109.5 . . ? 
H43A C43 H43C 109.5 . . ? 
H43B C43 H43C 109.5 . . ? 
O7 C44 N3 111.9(2) . . ? 
O7 C44 C2 126.9(3) . . ? 
N3 C44 C2 121.1(3) . . ? 
O1 C45 N2 112.1(2) . . ? 
O1 C45 C11 125.2(3) . . ? 
N2 C45 C11 122.7(3) . . ? 
C32 C46 H46A 109.5 . . ? 
C32 C46 H46B 109.5 . . ? 
H46A C46 H46B 109.5 . . ? 
C32 C46 H46C 109.5 . . ? 
H46A C46 H46C 109.5 . . ? 
H46B C46 H46C 109.5 . . ? 
 
loop_ 
 _geom_torsion_atom_site_label_1 
 _geom_torsion_atom_site_label_2 
 _geom_torsion_atom_site_label_3 
 _geom_torsion_atom_site_label_4 
 _geom_torsion 
 _geom_torsion_site_symmetry_1 
 _geom_torsion_site_symmetry_2 
 _geom_torsion_site_symmetry_3 
 _geom_torsion_site_symmetry_4 
 _geom_torsion_publ_flag 
O10 Ni5 F1 Ni2 66.26(9) . . . . ? 
O11 Ni5 F1 Ni2 157.74(8) . . . . ? 
N2 Ni5 F1 Ni2 -106.1(3) . . . . ? 
O6 Ni5 F1 Ni2 -25.17(7) . . . . ? 
O1 Ni5 F1 Ni2 -101.40(7) . . . . ? 
O10 Ni5 F1 Ni3 -123.46(10) . . . . ? 
O11 Ni5 F1 Ni3 -31.98(10) . . . . ? 
N2 Ni5 F1 Ni3 64.2(3) . . . . ? 
O6 Ni5 F1 Ni3 145.11(10) . . . . ? 
O1 Ni5 F1 Ni3 68.88(10) . . . . ? 
O8 Ni2 F1 Ni5 8.6(4) . . . . ? 
O13 Ni2 F1 Ni5 -65.41(8) . . . . ? 
O4 Ni2 F1 Ni5 -159.65(7) 3_556 . . . ? 
O6 Ni2 F1 Ni5 25.75(7) . . . . ? 
O2 Ni2 F1 Ni5 121.30(7) . . . . ? 
O8 Ni2 F1 Ni3 -158.3(4) . . . . ? 
O13 Ni2 F1 Ni3 127.63(13) . . . . ? 
O4 Ni2 F1 Ni3 33.39(13) 3_556 . . . ? 
O6 Ni2 F1 Ni3 -141.21(14) . . . . ? 
O2 Ni2 F1 Ni3 -45.66(13) . . . . ? 
O12 Ni3 F1 Ni5 31.8(8) 3_556 . . . ? 
O7 Ni3 F1 Ni5 -36.61(10) . . . . ? 
O3 Ni3 F1 Ni5 57.56(9) . . . . ? 
O4 Ni3 F1 Ni5 -122.25(9) . . . . ? 
O2 Ni3 F1 Ni5 159.64(9) 3_556 . . . ? 
O12 Ni3 F1 Ni2 -163.0(7) 3_556 . . . ? 
O7 Ni3 F1 Ni2 128.59(13) . . . . ? 
O3 Ni3 F1 Ni2 -137.24(14) . . . . ? 
O4 Ni3 F1 Ni2 42.95(13) . . . . ? 
O2 Ni3 F1 Ni2 -35.15(13) 3_556 . . . ? 
O9 Ni4 O1 C45 -63.4(2) . . . . ? 
O5 Ni4 O1 C45 -161.8(2) . . . . ? 
O7 Ni4 O1 C45 102.6(2) . . . . ? 
N4 Ni4 O1 C45 -171.4(8) . . . . ? 
N3 Ni4 O1 C45 39.4(2) . . . . ? 
O9 Ni4 O1 Ni1 68.48(8) . . . . ? 
O5 Ni4 O1 Ni1 -29.90(7) . . . . ? 
O7 Ni4 O1 Ni1 -125.57(8) . . . . ? 
N4 Ni4 O1 Ni1 -39.5(9) . . . . ? 
N3 Ni4 O1 Ni1 171.24(8) . . . . ? 
O9 Ni4 O1 Ni5 169.94(11) . . . . ? 
O5 Ni4 O1 Ni5 71.56(11) . . . . ? 
O7 Ni4 O1 Ni5 -24.11(11) . . . . ? 
N4 Ni4 O1 Ni5 61.9(9) . . . . ? 
N3 Ni4 O1 Ni5 -87.30(12) . . . . ? 
O14 Ni1 O1 C45 73.5(2) . . . . ? 
O5 Ni1 O1 C45 171.0(2) . . . . ? 
N5 Ni1 O1 C45 -139.1(4) . . . . ? 
N1 Ni1 O1 C45 -27.3(2) . . . . ? 
O6 Ni1 O1 C45 -88.4(2) . . . . ? 
O14 Ni1 O1 Ni4 -67.30(9) . . . . ? 
O5 Ni1 O1 Ni4 30.19(7) . . . . ? 
N5 Ni1 O1 Ni4 80.1(4) . . . . ? 
N1 Ni1 O1 Ni4 -168.13(9) . . . . ? 
O6 Ni1 O1 Ni4 130.80(8) . . . . ? 
O14 Ni1 O1 Ni5 167.86(8) . . . . ? 
O5 Ni1 O1 Ni5 -94.65(8) . . . . ? 
N5 Ni1 O1 Ni5 -44.8(5) . . . . ? 
N1 Ni1 O1 Ni5 67.03(9) . . . . ? 
O6 Ni1 O1 Ni5 5.96(7) . . . . ? 
O10 Ni5 O1 C45 44.7(3) . . . . ? 
O11 Ni5 O1 C45 -76.94(16) . . . . ? 
F1 Ni5 O1 C45 -171.89(15) . . . . ? 
N2 Ni5 O1 C45 6.42(15) . . . . ? 
O6 Ni5 O1 C45 112.70(16) . . . . ? 
O10 Ni5 O1 Ni4 -172.09(18) . . . . ? 
O11 Ni5 O1 Ni4 66.29(12) . . . . ? 
F1 Ni5 O1 Ni4 -28.66(12) . . . . ? 
N2 Ni5 O1 Ni4 149.65(14) . . . . ? 
O6 Ni5 O1 Ni4 -104.07(11) . . . . ? 
O10 Ni5 O1 Ni1 -74.0(2) . . . . ? 
O11 Ni5 O1 Ni1 164.36(8) . . . . ? 
F1 Ni5 O1 Ni1 69.40(8) . . . . ? 
N2 Ni5 O1 Ni1 -112.28(10) . . . . ? 
O6 Ni5 O1 Ni1 -6.00(7) . . . . ? 
O4 P1 O2 Ni2 62.44(14) . . . . ? 
O5 P1 O2 Ni2 -62.51(14) . . . . ? 
C1 P1 O2 Ni2 -179.57(12) . . . . ? 
O4 P1 O2 Ni3 -56.26(16) . . . 3_556 ? 
O5 P1 O2 Ni3 178.78(12) . . . 3_556 ? 
C1 P1 O2 Ni3 61.72(16) . . . 3_556 ? 
O8 Ni2 O2 P1 155.86(12) . . . . ? 
F1 Ni2 O2 P1 -12.73(12) . . . . ? 
O13 Ni2 O2 P1 -109.3(7) . . . . ? 
O4 Ni2 O2 P1 -104.53(13) 3_556 . . . ? 
O6 Ni2 O2 P1 65.52(13) . . . . ? 
O8 Ni2 O2 Ni3 -67.93(8) . . . 3_556 ? 
F1 Ni2 O2 Ni3 123.48(7) . . . 3_556 ? 
O13 Ni2 O2 Ni3 27.0(7) . . . 3_556 ? 
O4 Ni2 O2 Ni3 31.68(7) 3_556 . . 3_556 ? 
O6 Ni2 O2 Ni3 -158.27(7) . . . 3_556 ? 
O12 Ni3 O3 C4 122.3(2) 3_556 . . . ? 
F1 Ni3 O3 C4 -55.2(2) . . . . ? 
O7 Ni3 O3 C4 37.0(2) . . . . ? 
O4 Ni3 O3 C4 -53.6(7) . . . . ? 
O2 Ni3 O3 C4 -143.0(2) 3_556 . . . ? 
O2 P1 O4 Ni2 60.19(16) . . . 3_556 ? 
O5 P1 O4 Ni2 -175.19(12) . . . 3_556 ? 
C1 P1 O4 Ni2 -59.51(17) . . . 3_556 ? 
O2 P1 O4 Ni3 -69.38(15) . . . . ? 
O5 P1 O4 Ni3 55.24(16) . . . . ? 
C1 P1 O4 Ni3 170.92(13) . . . . ? 
O12 Ni3 O4 P1 -157.76(13) 3_556 . . . ? 
F1 Ni3 O4 P1 19.68(13) . . . . ? 
O7 Ni3 O4 P1 -73.03(14) . . . . ? 
O3 Ni3 O4 P1 18.1(7) . . . . ? 
O2 Ni3 O4 P1 108.89(14) 3_556 . . . ? 
O12 Ni3 O4 Ni2 60.63(9) 3_556 . . 3_556 ? 
F1 Ni3 O4 Ni2 -121.94(7) . . . 3_556 ? 
O7 Ni3 O4 Ni2 145.36(8) . . . 3_556 ? 
O3 Ni3 O4 Ni2 -123.5(6) . . . 3_556 ? 
O2 Ni3 O4 Ni2 -32.72(7) 3_556 . . 3_556 ? 
O2 P1 O5 Ni1 -5.45(18) . . . . ? 
O4 P1 O5 Ni1 -133.10(14) . . . . ? 
C1 P1 O5 Ni1 112.38(16) . . . . ? 
O2 P1 O5 Ni4 144.78(13) . . . . ? 
O4 P1 O5 Ni4 17.13(18) . . . . ? 
C1 P1 O5 Ni4 -97.39(17) . . . . ? 
O14 Ni1 O5 P1 -138.42(15) . . . . ? 
N5 Ni1 O5 P1 -43.65(16) . . . . ? 
O1 Ni1 O5 P1 126.91(16) . . . . ? 
N1 Ni1 O5 P1 51.5(3) . . . . ? 
O6 Ni1 O5 P1 47.37(15) . . . . ? 
O14 Ni1 O5 Ni4 63.94(9) . . . . ? 
N5 Ni1 O5 Ni4 158.71(10) . . . . ? 
O1 Ni1 O5 Ni4 -30.72(7) . . . . ? 
N1 Ni1 O5 Ni4 -106.1(3) . . . . ? 
O6 Ni1 O5 Ni4 -110.27(8) . . . . ? 
O9 Ni4 O5 P1 141.10(15) . . . . ? 
O1 Ni4 O5 P1 -126.36(16) . . . . ? 
O7 Ni4 O5 P1 -40.34(15) . . . . ? 
N4 Ni4 O5 P1 52.54(16) . . . . ? 
N3 Ni4 O5 P1 -53.5(3) . . . . ? 
O9 Ni4 O5 Ni1 -61.23(9) . . . . ? 
O1 Ni4 O5 Ni1 31.31(7) . . . . ? 
O7 Ni4 O5 Ni1 117.32(8) . . . . ? 
N4 Ni4 O5 Ni1 -149.80(10) . . . . ? 
N3 Ni4 O5 Ni1 104.2(2) . . . . ? 
O8 Ni2 O6 C5 22.4(3) . . . . ? 
F1 Ni2 O6 C5 -154.0(3) . . . . ? 
O13 Ni2 O6 C5 -62.4(3) . . . . ? 
O4 Ni2 O6 C5 177.5(3) 3_556 . . . ? 
O2 Ni2 O6 C5 118.2(2) . . . . ? 
O8 Ni2 O6 Ni1 -103.34(11) . . . . ? 
F1 Ni2 O6 Ni1 80.27(10) . . . . ? 
O13 Ni2 O6 Ni1 171.82(11) . . . . ? 
O4 Ni2 O6 Ni1 51.8(4) 3_556 . . . ? 
O2 Ni2 O6 Ni1 -7.57(11) . . . . ? 
O8 Ni2 O6 Ni5 152.94(9) . . . . ? 
F1 Ni2 O6 Ni5 -23.46(7) . . . . ? 
O13 Ni2 O6 Ni5 68.09(8) . . . . ? 
O4 Ni2 O6 Ni5 -52.0(4) 3_556 . . . ? 
O2 Ni2 O6 Ni5 -111.29(7) . . . . ? 
O14 Ni1 O6 C5 25.3(3) . . . . ? 
O5 Ni1 O6 C5 -173.44(15) . . . . ? 
N5 Ni1 O6 C5 -79.19(17) . . . . ? 
O1 Ni1 O6 C5 110.34(16) . . . . ? 
N1 Ni1 O6 C5 8.06(16) . . . . ? 
O14 Ni1 O6 Ni2 169.2(2) . . . . ? 
O5 Ni1 O6 Ni2 -29.57(11) . . . . ? 
N5 Ni1 O6 Ni2 64.68(11) . . . . ? 
O1 Ni1 O6 Ni2 -105.79(11) . . . . ? 
N1 Ni1 O6 Ni2 151.94(14) . . . . ? 
O14 Ni1 O6 Ni5 -91.3(3) . . . . ? 
O5 Ni1 O6 Ni5 69.97(8) . . . . ? 
N5 Ni1 O6 Ni5 164.22(9) . . . . ? 
O1 Ni1 O6 Ni5 -6.25(7) . . . . ? 
N1 Ni1 O6 Ni5 -108.52(11) . . . . ? 
O10 Ni5 O6 C5 69.8(2) . . . . ? 
O11 Ni5 O6 C5 -176.1(5) . . . . ? 
F1 Ni5 O6 C5 166.1(2) . . . . ? 
N2 Ni5 O6 C5 -32.2(2) . . . . ? 
O1 Ni5 O6 C5 -90.8(2) . . . . ? 
O10 Ni5 O6 Ni2 -72.32(9) . . . . ? 
O11 Ni5 O6 Ni2 41.8(5) . . . . ? 
F1 Ni5 O6 Ni2 23.89(7) . . . . ? 
N2 Ni5 O6 Ni2 -174.41(8) . . . . ? 
O1 Ni5 O6 Ni2 127.00(8) . . . . ? 
O10 Ni5 O6 Ni1 166.63(8) . . . . ? 
O11 Ni5 O6 Ni1 -79.3(5) . . . . ? 
F1 Ni5 O6 Ni1 -97.16(8) . . . . ? 
N2 Ni5 O6 Ni1 64.54(9) . . . . ? 
O1 Ni5 O6 Ni1 5.95(7) . . . . ? 
O12 Ni3 O7 C44 -49.0(3) 3_556 . . . ? 
F1 Ni3 O7 C44 125.6(3) . . . . ? 
O3 Ni3 O7 C44 38.8(3) . . . . ? 
O4 Ni3 O7 C44 -148.0(3) . . . . ? 
O2 Ni3 O7 C44 -141.3(3) 3_556 . . . ? 
O12 Ni3 O7 Ni4 131.20(14) 3_556 . . . ? 
F1 Ni3 O7 Ni4 -54.22(13) . . . . ? 
O3 Ni3 O7 Ni4 -140.99(13) . . . . ? 
O4 Ni3 O7 Ni4 32.17(13) . . . . ? 
O2 Ni3 O7 Ni4 38.9(3) 3_556 . . . ? 
O9 Ni4 O7 C44 -2.1(4) . . . . ? 
O5 Ni4 O7 C44 -176.22(16) . . . . ? 
O1 Ni4 O7 C44 -98.15(16) . . . . ? 
N4 Ni4 O7 C44 88.41(17) . . . . ? 
N3 Ni4 O7 C44 -1.71(16) . . . . ? 
O9 Ni4 O7 Ni3 177.8(3) . . . . ? 
O5 Ni4 O7 Ni3 3.63(14) . . . . ? 
O1 Ni4 O7 Ni3 81.70(13) . . . . ? 
N4 Ni4 O7 Ni3 -91.74(14) . . . . ? 
N3 Ni4 O7 Ni3 178.15(16) . . . . ? 
F1 Ni2 O8 C14 161.8(3) . . . . ? 
O13 Ni2 O8 C14 -123.4(3) . . . . ? 
O4 Ni2 O8 C14 -30.1(3) 3_556 . . . ? 
O6 Ni2 O8 C14 145.1(3) . . . . ? 
O2 Ni2 O8 C14 49.8(3) . . . . ? 
O5 Ni4 O9 C3 35.5(3) . . . . ? 
O1 Ni4 O9 C3 -43.4(3) . . . . ? 
O7 Ni4 O9 C3 -138.6(3) . . . . ? 
N4 Ni4 O9 C3 130.3(3) . . . . ? 
N3 Ni4 O9 C3 -139.0(3) . . . . ? 
O11 Ni5 O10 C16 -130.4(3) . . . . ? 
F1 Ni5 O10 C16 -37.2(3) . . . . ? 
N2 Ni5 O10 C16 140.3(2) . . . . ? 
O6 Ni5 O10 C16 40.9(3) . . . . ? 
O1 Ni5 O10 C16 106.6(3) . . . . ? 
O10 Ni5 O11 C4 71.2(3) . . . . ? 
F1 Ni5 O11 C4 -25.5(3) . . . . ? 
N2 Ni5 O11 C4 172.7(3) . . . . ? 
O6 Ni5 O11 C4 -43.0(6) . . . . ? 
O1 Ni5 O11 C4 -126.4(2) . . . . ? 
O8 Ni2 O13 C16 -125.6(3) . . . . ? 
F1 Ni2 O13 C16 42.5(3) . . . . ? 
O4 Ni2 O13 C16 134.2(3) 3_556 . . . ? 
O6 Ni2 O13 C16 -35.9(3) . . . . ? 
O2 Ni2 O13 C16 138.9(6) . . . . ? 
O5 Ni1 O14 C3 -43.0(3) . . . . ? 
N5 Ni1 O14 C3 -137.9(3) . . . . ? 
O1 Ni1 O14 C3 35.5(3) . . . . ? 
N1 Ni1 O14 C3 133.7(3) . . . . ? 
O6 Ni1 O14 C3 118.2(3) . . . . ? 
O14 Ni1 N1 C15 15.4(5) . . . . ? 
O5 Ni1 N1 C15 -174.6(4) . . . . ? 
N5 Ni1 N1 C15 -78.3(5) . . . . ? 
O1 Ni1 N1 C15 113.1(5) . . . . ? 
O6 Ni1 N1 C15 -169.9(5) . . . . ? 
O14 Ni1 N1 C5 177.34(17) . . . . ? 
O5 Ni1 N1 C5 -12.6(4) . . . . ? 
N5 Ni1 N1 C5 83.59(19) . . . . ? 
O1 Ni1 N1 C5 -84.95(18) . . . . ? 
O6 Ni1 N1 C5 -8.02(16) . . . . ? 
O10 Ni5 N2 C26 22.7(4) . . . . ? 
O11 Ni5 N2 C26 -68.3(4) . . . . ? 
F1 Ni5 N2 C26 -165.1(3) . . . . ? 
O6 Ni5 N2 C26 117.3(4) . . . . ? 
O1 Ni5 N2 C26 -170.3(4) . . . . ? 
O10 Ni5 N2 C45 -173.37(17) . . . . ? 
O11 Ni5 N2 C45 95.68(17) . . . . ? 
F1 Ni5 N2 C45 -1.1(4) . . . . ? 
O6 Ni5 N2 C45 -78.72(17) . . . . ? 
O1 Ni5 N2 C45 -6.38(15) . . . . ? 
O9 Ni4 N3 C21 -4.4(4) . . . . ? 
O5 Ni4 N3 C21 -169.6(3) . . . . ? 
O1 Ni4 N3 C21 -99.8(4) . . . . ? 
O7 Ni4 N3 C21 175.7(4) . . . . ? 
N4 Ni4 N3 C21 83.6(4) . . . . ? 
O9 Ni4 N3 C44 -178.46(16) . . . . ? 
O5 Ni4 N3 C44 16.3(3) . . . . ? 
O1 Ni4 N3 C44 86.17(16) . . . . ? 
O7 Ni4 N3 C44 1.64(15) . . . . ? 
N4 Ni4 N3 C44 -90.48(17) . . . . ? 
O9 Ni4 N4 C12 0.5(17) . . . . ? 
O5 Ni4 N4 C12 99.4(17) . . . . ? 
O1 Ni4 N4 C12 108.9(18) . . . . ? 
O7 Ni4 N4 C12 -165.4(17) . . . . ? 
N3 Ni4 N4 C12 -101.8(17) . . . . ? 
O14 Ni1 N5 C22 163.9(14) . . . . ? 
O5 Ni1 N5 C22 64.9(14) . . . . ? 
O1 Ni1 N5 C22 16.4(16) . . . . ? 
N1 Ni1 N5 C22 -96.4(14) . . . . ? 
O6 Ni1 N5 C22 -33.6(14) . . . . ? 
O2 P1 C1 C23 72.5(2) . . . . ? 
O4 P1 C1 C23 -163.7(2) . . . . ? 
O5 P1 C1 C23 -46.0(3) . . . . ? 
Ni1 O14 C3 O9 5.5(5) . . . . ? 
Ni1 O14 C3 C31 -172.5(2) . . . . ? 
Ni4 O9 C3 O14 -1.3(5) . . . . ? 
Ni4 O9 C3 C31 176.7(2) . . . . ? 
Ni3 O3 C4 O11 13.7(4) . . . . ? 
Ni3 O3 C4 C10 -168.3(2) . . . . ? 
Ni5 O11 C4 O3 39.3(4) . . . . ? 
Ni5 O11 C4 C10 -138.8(2) . . . . ? 
Ni2 O6 C5 N1 -147.4(2) . . . . ? 
Ni1 O6 C5 N1 -12.2(2) . . . . ? 
Ni5 O6 C5 N1 90.1(3) . . . . ? 
Ni2 O6 C5 C8 32.3(4) . . . . ? 
Ni1 O6 C5 C8 167.5(3) . . . . ? 
Ni5 O6 C5 C8 -90.2(3) . . . . ? 
C15 N1 C5 O6 -178.6(3) . . . . ? 
Ni1 N1 C5 O6 12.4(2) . . . . ? 
C15 N1 C5 C8 1.7(5) . . . . ? 
Ni1 N1 C5 C8 -167.4(3) . . . . ? 
C44 C2 C6 C25 -0.2(5) . . . . ? 
O6 C5 C8 C30 178.9(3) . . . . ? 
N1 C5 C8 C30 -1.5(5) . . . . ? 
O3 C4 C10 C18 -93.1(3) . . . . ? 
O11 C4 C10 C18 85.1(3) . . . . ? 
O3 C4 C10 C20 28.3(4) . . . . ? 
O11 C4 C10 C20 -153.5(3) . . . . ? 
O3 C4 C10 C28 148.9(3) . . . . ? 
O11 C4 C10 C28 -32.9(4) . . . . ? 
Ni4 N4 C12 C40 -86(23) . . . . ? 
Ni2 O8 C14 O12 -15.7(5) . . . . ? 
Ni2 O8 C14 C32 154.8(3) . . . . ? 
Ni3 O12 C14 O8 14.7(5) 3_556 . . . ? 
Ni3 O12 C14 C32 -155.6(3) 3_556 . . . ? 
C5 N1 C15 C27 -1.8(6) . . . . ? 
Ni1 N1 C15 C27 157.6(4) . . . . ? 
C5 N1 C15 Cl1 -179.9(2) . . . . ? 
Ni1 N1 C15 Cl1 -20.5(6) . . . . ? 
Ni2 O13 C16 O10 -8.4(5) . . . . ? 
Ni2 O13 C16 C9 171.6(2) . . . . ? 
Ni5 O10 C16 O13 4.6(5) . . . . ? 
Ni5 O10 C16 C9 -175.4(2) . . . . ? 
C1' C9 C16 O13 -88.2(15) . . . . ? 
C41 C9 C16 O13 83.7(5) . . . . ? 
C29 C9 C16 O13 -37.5(5) . . . . ? 
C42 C9 C16 O13 -154.4(4) . . . . ? 
C3' C9 C16 O13 142.2(10) . . . . ? 
C2' C9 C16 O13 31.0(11) . . . . ? 
C1' C9 C16 O10 91.8(15) . . . . ? 
C41 C9 C16 O10 -96.2(5) . . . . ? 
C29 C9 C16 O10 142.6(4) . . . . ? 
C42 C9 C16 O10 25.7(5) . . . . ? 
C3' C9 C16 O10 -37.7(10) . . . . ? 
C2' C9 C16 O10 -148.9(11) . . . . ? 
C45 C11 C17 C24 0.3(6) . . . . ? 
C44 N3 C21 C25 -0.6(5) . . . . ? 
Ni4 N3 C21 C25 -173.8(3) . . . . ? 
C44 N3 C21 Cl2 178.3(2) . . . . ? 
Ni4 N3 C21 Cl2 5.2(5) . . . . ? 
Ni1 N5 C22 C34 14(8) . . . . ? 
C38 C13 C23 C7 0.7(6) . . . . ? 
C38 C13 C23 C1 -177.2(4) . . . . ? 
C36 C7 C23 C13 0.2(6) . . . . ? 
C36 C7 C23 C1 178.0(3) . . . . ? 
P1 C1 C23 C13 -103.0(3) . . . . ? 
P1 C1 C23 C7 79.2(4) . . . . ? 
C11 C17 C24 C26 1.3(6) . . . . ? 
N3 C21 C25 C6 0.9(5) . . . . ? 
Cl2 C21 C25 C6 -178.1(2) . . . . ? 
C2 C6 C25 C21 -0.4(5) . . . . ? 
C45 N2 C26 C24 1.1(5) . . . . ? 
Ni5 N2 C26 C24 162.9(3) . . . . ? 
C45 N2 C26 Cl3 -178.8(2) . . . . ? 
Ni5 N2 C26 Cl3 -17.0(5) . . . . ? 
C17 C24 C26 N2 -2.0(6) . . . . ? 
C17 C24 C26 Cl3 177.9(3) . . . . ? 
N1 C15 C27 C30 1.5(7) . . . . ? 
Cl1 C15 C27 C30 179.6(3) . . . . ? 
C5 C8 C30 C27 1.2(6) . . . . ? 
C15 C27 C30 C8 -1.2(7) . . . . ? 
O14 C3 C31 C35 107.5(4) . . . . ? 
O9 C3 C31 C35 -70.7(4) . . . . ? 
O14 C3 C31 C39 -133.0(3) . . . . ? 
O9 C3 C31 C39 48.9(4) . . . . ? 
O14 C3 C31 C19 -12.3(4) . . . . ? 
O9 C3 C31 C19 169.6(3) . . . . ? 
O8 C14 C32 C33 36.0(6) . . . . ? 
O12 C14 C32 C33 -152.8(4) . . . . ? 
O8 C14 C32 C43 161.4(4) . . . . ? 
O12 C14 C32 C43 -27.4(6) . . . . ? 
O8 C14 C32 C46 -81.1(5) . . . . ? 
O12 C14 C32 C46 90.1(5) . . . . ? 
C23 C7 C36 C37 -1.0(7) . . . . ? 
C7 C36 C37 C38 1.0(8) . . . . ? 
C36 C37 C38 C13 -0.1(9) . . . . ? 
C23 C13 C38 C37 -0.7(8) . . . . ? 
Ni3 O7 C44 N3 -177.27(18) . . . . ? 
Ni4 O7 C44 N3 2.6(2) . . . . ? 
Ni3 O7 C44 C2 3.7(5) . . . . ? 
Ni4 O7 C44 C2 -176.5(3) . . . . ? 
C21 N3 C44 O7 -179.1(2) . . . . ? 
Ni4 N3 C44 O7 -2.5(2) . . . . ? 
C21 N3 C44 C2 0.0(4) . . . . ? 
Ni4 N3 C44 C2 176.6(2) . . . . ? 
C6 C2 C44 O7 179.4(3) . . . . ? 
C6 C2 C44 N3 0.5(4) . . . . ? 
Ni4 O1 C45 N2 -147.9(2) . . . . ? 
Ni1 O1 C45 N2 89.9(2) . . . . ? 
Ni5 O1 C45 N2 -9.5(2) . . . . ? 
Ni4 O1 C45 C11 31.3(4) . . . . ? 
Ni1 O1 C45 C11 -90.9(3) . . . . ? 
Ni5 O1 C45 C11 169.6(3) . . . . ? 
C26 N2 C45 O1 179.8(3) . . . . ? 
Ni5 N2 C45 O1 10.2(2) . . . . ? 
C26 N2 C45 C11 0.6(4) . . . . ? 
Ni5 N2 C45 C11 -169.0(3) . . . . ? 
C17 C11 C45 O1 179.6(3) . . . . ? 
C17 C11 C45 N2 -1.3(5) . . . . ? 
 
_diffrn_measured_fraction_theta_max    0.996 
_diffrn_reflns_theta_full              29.49 
_diffrn_measured_fraction_theta_full   0.996 
_refine_diff_density_max    1.417 
_refine_diff_density_min   -0.732 
_refine_diff_density_rms    0.090 
